# Supplementary material for: Kinesiology Students’ Perception Regarding Exercise Oncology: A Cross-Sectional Study
Source: MDPI journal article supplement (doi:10.3390/ijerph19137724), 2022-06-23
Supplement: s1 [file s1]

### ***Section S1. Questionnaire to knowledge, perception, and expectations of exercise oncology***

The following anonymous questionnaire investigates some aspects concerning the effect of physical activity in the oncology field. Read each statement and indicate your answers as accurately as possible. There are no right or wrong answers, just personal answers. Please, do not leave any questions unanswered.

Pursuant to EU Reg. 2016/679 or GDPR, "Code regarding the protection of personal data", we inform you that: (a) the answers provided will be used only in the research project context; (b) the data will be analysed for scientific purposes only; (c) the survey results will be published only in aggregate manner.

1. Age (years)

\_\_\_\_\_

2. Sex (mark one answer only)

- ☐ Male
- ☐ Female

3. Weight (kilograms)

\_\_\_\_\_

4. Height (meters)

\_\_\_\_\_

5. Are you affected by, or have you been diagnosed with cancer? (mark one answer only)

- ☐ Yes
- ☐ No

6. Do you have or have you had a family member or a person close to you, who has or has had a diagnosis of cancer? (mark one answer only)

- ☐ Yes
- ☐ No

7. Which university are you enrolled in? (mark one answer only)

- ☐ University of Verona
- ☐ University of Rome "Foro Italico"
- ☐ University of Urbino
- ☐ University of Chieti-Pescara

8. Academic course (current attendance - mark one answer only)

- ☐ Bachelor's Degree program in Exercise and Sports Sciences (L-22)
- ☐ Master's Degree program in Health and Physical Activity (LM-67)
- ☐ Master's Degree program in Sports Sciences and Physical Performance (LM-68)
- ☐ Master's Degree program in Management of Sport (LM-47)

9. Current year of attendance (mark one answer only)

- ☐ 1
- ☐ 2
- ☐ 3
- ☐ 4
- ☐ 5

10. Have you ever been enrolled in advanced courses, training courses, and/or webinars on the “physical exercise and oncology” topic?

- ☐ No
- ☐ Yes (name it in the other section)

Other section \_\_\_\_\_

11. What is the minimum amount of moderate-intensity aerobic exercise suggested for people who have or have been diagnosed with cancer, according to the American College of Sports Medicine? (mark one answer only)

- ☐ At least 50 minutes per week
- ☐ At least 90 minutes per week
- ☐ At least 120 minutes per week
- ☐ Aerobic activity is not recommended

12. What is the minimum amount of strength exercise suggested for people who have or have been diagnosed with cancer, according to the American College of Sports Medicine? (mark one answer only)

- ☐ At least once per week
- ☐ At least twice per week
- ☐ At least 3 times per week
- ☐ Strength activity is not recommended

13. Answer for each of the following statements / questions (mark only one answer per line)

|                                                                                                                                                                          | <i>Absolutely<br/>yes</i> | <i>Yes, rather<br/>than no</i> | <i>No, rather<br/>than yes</i> | <i>Absolutely<br/>no</i> |
|--------------------------------------------------------------------------------------------------------------------------------------------------------------------------|---------------------------|--------------------------------|--------------------------------|--------------------------|
| Do you think that physical activity is important to prevent breast, prostate and colorectum cancers?                                                                     |                           |                                |                                |                          |
| Are there teachings, in your degree program, that explain the prescription of physical activity and exercise as primary prevention of chronic non-communicable diseases? |                           |                                |                                |                          |
| Are there teachings, in your degree program, that explain the physiopathology and treatments of cancer?                                                                  |                           |                                |                                |                          |
| Are there teachings, in your degree program, that explain the importance of psychological aspect in cancer?                                                              |                           |                                |                                |                          |

14. In your opinion, is exercise important and effective for psycho-physical health in patients with cancer?

|  | <i>Absolutely<br/>yes</i> | <i>Yes, rather<br/>than no</i> | <i>No, rather<br/>than yes</i> | <i>Absolutely<br/>no</i> |
|--|---------------------------|--------------------------------|--------------------------------|--------------------------|
|  |                           |                                |                                |                          |

|                                                                                                 |  |  |  |  |
|-------------------------------------------------------------------------------------------------|--|--|--|--|
| Before surgery (prehabilitation)                                                                |  |  |  |  |
| During anticancer treatments (e.g., chemotherapy, radiotherapy, immunotherapy, hormone therapy) |  |  |  |  |
| After anticancer treatments                                                                     |  |  |  |  |

15. Are there teachings in your degree program that explain the prescription of physical activity and exercise for patients with cancer?

|                                                                                                 | <i>Absolutely yes</i> | <i>Yes, rather than no</i> | <i>No, rather than yes</i> | <i>Absolutely no</i> |
|-------------------------------------------------------------------------------------------------|-----------------------|----------------------------|----------------------------|----------------------|
| Before surgery (prehabilitation)                                                                |                       |                            |                            |                      |
| During anticancer treatments (e.g., chemotherapy, radiotherapy, immunotherapy, hormone therapy) |                       |                            |                            |                      |
| After anticancer treatments                                                                     |                       |                            |                            |                      |

16. Do you have sufficient knowledge and expertise for counselling physical activity to patients with cancer?

|                                                                                                 | <i>Absolutely yes</i> | <i>Yes, rather than no</i> | <i>No, rather than yes</i> | <i>Absolutely no</i> |
|-------------------------------------------------------------------------------------------------|-----------------------|----------------------------|----------------------------|----------------------|
| Before surgery (prehabilitation)                                                                |                       |                            |                            |                      |
| During anticancer treatments (e.g., chemotherapy, radiotherapy, immunotherapy, hormone therapy) |                       |                            |                            |                      |
| After anticancer treatments                                                                     |                       |                            |                            |                      |

17. Do you have sufficient knowledge and expertise to prescribe exercise in patients with cancer?

|  | <i>Absolutely yes</i> | <i>Yes, rather than no</i> | <i>No, rather than yes</i> | <i>Absolutely no</i> |
|--|-----------------------|----------------------------|----------------------------|----------------------|
|  |                       |                            |                            |                      |

|                                                                                                 |  |  |  |  |
|-------------------------------------------------------------------------------------------------|--|--|--|--|
| Before surgery (prehabilitation)                                                                |  |  |  |  |
| During anticancer treatments (e.g., chemotherapy, radiotherapy, immunotherapy, hormone therapy) |  |  |  |  |
| After anticancer treatments                                                                     |  |  |  |  |

18. Do you have sufficient knowledge and expertise to lead a group-based exercise training for patients with cancer?

|                                                                                                 | <i>Absolutely<br/>yes</i> | <i>Yes, rather<br/>than no</i> | <i>No, rather<br/>than yes</i> | <i>Absolutely<br/>no</i> |
|-------------------------------------------------------------------------------------------------|---------------------------|--------------------------------|--------------------------------|--------------------------|
| Before surgery (prehabilitation)                                                                |                           |                                |                                |                          |
| During anticancer treatments (e.g., chemotherapy, radiotherapy, immunotherapy, hormone therapy) |                           |                                |                                |                          |
| After anticancer treatments                                                                     |                           |                                |                                |                          |

19. Do you have sufficient knowledge and expertise to lead an individual-based exercise training for patients with cancer?

|                                                                                                 | <i>Absolutely<br/>yes</i> | <i>Yes, rather<br/>than no</i> | <i>No, rather<br/>than yes</i> | <i>Absolutely<br/>no</i> |
|-------------------------------------------------------------------------------------------------|---------------------------|--------------------------------|--------------------------------|--------------------------|
| Before surgery (prehabilitation)                                                                |                           |                                |                                |                          |
| During anticancer treatments (e.g., chemotherapy, radiotherapy, immunotherapy, hormone therapy) |                           |                                |                                |                          |
| After anticancer treatments                                                                     |                           |                                |                                |                          |

**Table S1.** Students' knowledge, perception, and confidence to "exercise oncology" theme according to academic degree.

|                                                                                                                                                                        | <i>Academic course</i> |                            |                            |                       |                                                                |                            |                            |                       |                                                                           |                            |                            |                       |                                                 |                            |                            |                       |
|------------------------------------------------------------------------------------------------------------------------------------------------------------------------|------------------------|----------------------------|----------------------------|-----------------------|----------------------------------------------------------------|----------------------------|----------------------------|-----------------------|---------------------------------------------------------------------------|----------------------------|----------------------------|-----------------------|-------------------------------------------------|----------------------------|----------------------------|-----------------------|
|                                                                                                                                                                        | <b>All (n=854)</b>     |                            |                            |                       | <i>Bachelor's Degree in Sport and Exercise Science (n=497)</i> |                            |                            |                       | <i>Master's Degree in Preventive and Adapted Exercise Science (n=285)</i> |                            |                            |                       | <i>Other Master's Degree<sup>1</sup> (n=72)</i> |                            |                            |                       |
| Do you think that physical activity is important to prevent breast, prostate and colorectum cancers?                                                                   | <b>Absolutely no</b>   | <b>No, rather than yes</b> | <b>Yes, rather than no</b> | <b>Absolutely yes</b> | <b>Absolutely no</b>                                           | <b>No, rather than yes</b> | <b>Yes, rather than no</b> | <b>Absolutely yes</b> | <b>Absolutely no</b>                                                      | <b>No, rather than yes</b> | <b>Yes, rather than no</b> | <b>Absolutely yes</b> | <b>Absolutely no</b>                            | <b>No, rather than yes</b> | <b>Yes, rather than no</b> | <b>Absolutely yes</b> |
|                                                                                                                                                                        | %                      | %                          | %                          | %                     | %                                                              | %                          | %                          | %                     | %                                                                         | %                          | %                          | %                     | %                                               | %                          | %                          | %                     |
|                                                                                                                                                                        | 0                      | 4                          | 25                         | 71                    | 1                                                              | 6                          | 31                         | 62                    | 0                                                                         | 1                          | 14                         | 85                    | 0                                               | 3                          | 22                         | 75                    |
| Are there teachings in your degree program that explain the prescription of physical activity and exercise as primary prevention of chronic non-communicable diseases? | 13                     | 25                         | 26                         | 36                    | 1                                                              | 32                         | 27                         | 25                    | 4                                                                         | 10                         | 26                         | 60                    | 22                                              | 36                         | 21                         | 21                    |
| Are there teachings in your degree program that explain the physiopathology and treatments of cancer?                                                                  | 22                     | 38                         | 25                         | 15                    | 25                                                             | 40                         | 25                         | 10                    | 12                                                                        | 33                         | 29                         | 26                    | 43                                              | 39                         | 10                         | 8                     |

|                                                                                                                                             |    |    |    |    |    |    |    |    |    |    |    |    |    |    |    |    |
|---------------------------------------------------------------------------------------------------------------------------------------------|----|----|----|----|----|----|----|----|----|----|----|----|----|----|----|----|
| Are there teachings in your degree program that explain the importance of psychological aspect in cancer?                                   | 32 | 38 | 19 | 11 | 39 | 36 | 17 | 8  | 21 | 40 | 23 | 16 | 33 | 44 | 14 | 8  |
| <i>Is exercise important and effective for psycho-physical health in patients with cancer?</i>                                              |    |    |    |    |    |    |    |    |    |    |    |    |    |    |    |    |
| Before surgery                                                                                                                              | 1  | 4  | 27 | 69 | 1  | 5  | 34 | 60 | 0  | 1  | 18 | 80 | 3  | 4  | 15 | 78 |
| During anticancer treatments (chemotherapy, radiotherapy etc.)                                                                              | 2  | 13 | 32 | 52 | 2  | 16 | 36 | 45 | 1  | 9  | 26 | 63 | 1  | 8  | 33 | 57 |
| After anticancer treatments                                                                                                                 | 0  | 1  | 17 | 81 | 0  | 1  | 24 | 75 | 0  | 1  | 8  | 91 | 1  | 1  | 10 | 88 |
| <i>Are there teachings in your degree program that explain the prescription of physical activity and exercise for patients with cancer?</i> |    |    |    |    |    |    |    |    |    |    |    |    |    |    |    |    |
| Before surgery                                                                                                                              | 24 | 36 | 23 | 16 | 28 | 39 | 21 | 12 | 12 | 31 | 31 | 27 | 50 | 35 | 13 | 3  |
| During anticancer treatments (chemotherapy, radiotherapy etc.)                                                                              | 25 | 38 | 23 | 13 | 29 | 40 | 22 | 9  | 13 | 36 | 28 | 22 | 50 | 33 | 14 | 3  |
| After anticancer treatments                                                                                                                 | 23 | 33 | 25 | 19 | 26 | 36 | 23 | 15 | 12 | 28 | 31 | 29 | 46 | 38 | 14 | 3  |
| <i>Do you have sufficient knowledge and expertise for counselling physical activity to patients with cancer?</i>                            |    |    |    |    |    |    |    |    |    |    |    |    |    |    |    |    |
| Before surgery                                                                                                                              | 29 | 40 | 23 | 7  | 39 | 39 | 16 | 6  | 11 | 40 | 37 | 12 | 35 | 43 | 18 | 4  |
| During anticancer treatments (chemotherapy, radiotherapy etc.)                                                                              | 32 | 43 | 29 | 6  | 42 | 42 | 11 | 5  | 13 | 47 | 33 | 8  | 42 | 39 | 15 | 4  |
| After anticancer treatments                                                                                                                 | 28 | 38 | 26 | 9  | 36 | 39 | 17 | 7  | 11 | 35 | 41 | 13 | 36 | 36 | 22 | 6  |

|                                                                                                                               |    |    |    |   |    |    |    |   |    |    |    |    |    |    |    |   |  |
|-------------------------------------------------------------------------------------------------------------------------------|----|----|----|---|----|----|----|---|----|----|----|----|----|----|----|---|--|
| <i>Do you have sufficient knowledge and expertise to prescribe exercise in patients with cancer?</i>                          |    |    |    |   |    |    |    |   |    |    |    |    |    |    |    |   |  |
| Before surgery                                                                                                                | 31 | 40 | 21 | 7 | 40 | 40 | 15 | 5 | 13 | 41 | 35 | 11 | 42 | 40 | 15 | 3 |  |
| During anticancer treatments (chemotherapy, radiotherapy etc.)                                                                | 34 | 43 | 17 | 5 | 43 | 42 | 10 | 5 | 14 | 47 | 32 | 7  | 49 | 40 | 10 | 1 |  |
| After anticancer treatments                                                                                                   | 30 | 39 | 23 | 8 | 38 | 40 | 15 | 7 | 12 | 38 | 38 | 12 | 43 | 36 | 18 | 3 |  |
| <i>Do you have sufficient knowledge and expertise to lead a group-based exercise training for patients with cancer?</i>       |    |    |    |   |    |    |    |   |    |    |    |    |    |    |    |   |  |
| Before surgery                                                                                                                | 30 | 42 | 22 | 6 | 38 | 40 | 16 | 5 | 13 | 46 | 34 | 7  | 42 | 38 | 19 | 1 |  |
| During anticancer treatments (chemotherapy, radiotherapy etc.)                                                                | 32 | 46 | 17 | 5 | 41 | 44 | 10 | 5 | 14 | 52 | 30 | 5  | 46 | 38 | 15 | 1 |  |
| After anticancer treatments                                                                                                   | 28 | 41 | 23 | 7 | 37 | 40 | 16 | 7 | 12 | 43 | 37 | 8  | 38 | 42 | 18 | 3 |  |
| <i>Do you have sufficient knowledge and expertise to lead an individual-based exercise training for patients with cancer?</i> |    |    |    |   |    |    |    |   |    |    |    |    |    |    |    |   |  |
| Before surgery                                                                                                                | 29 | 39 | 25 | 8 | 36 | 38 | 20 | 6 | 13 | 40 | 35 | 13 | 38 | 42 | 18 | 3 |  |
| During anticancer treatments (chemotherapy, radiotherapy etc.)                                                                | 32 | 43 | 19 | 6 | 40 | 42 | 12 | 6 | 15 | 46 | 31 | 8  | 46 | 40 | 13 | 1 |  |
| After anticancer treatments                                                                                                   | 27 | 39 | 25 | 9 | 34 | 39 | 20 | 7 | 12 | 38 | 37 | 13 | 38 | 43 | 17 | 3 |  |

**Table S2.** Students' knowledge, perception, and confidence to "exercise oncology" theme according to academic degree and dividing 1<sup>st</sup> and 2<sup>nd</sup> year vs. 3<sup>rd</sup> year of bachelor's degree.

| Academic course                                                                                                                                                |                                                                                                  |                     |                     |                |                                                                              |                     |                     |                |                                                                    |                     |                     |                |                                           |                     |                     |                |
|----------------------------------------------------------------------------------------------------------------------------------------------------------------|--------------------------------------------------------------------------------------------------|---------------------|---------------------|----------------|------------------------------------------------------------------------------|---------------------|---------------------|----------------|--------------------------------------------------------------------|---------------------|---------------------|----------------|-------------------------------------------|---------------------|---------------------|----------------|
|                                                                                                                                                                | Bachelor's Degree in Sport and Exercise Science 1 <sup>st</sup> and 2 <sup>nd</sup> year (n=179) |                     |                     |                | Bachelor'sDdegree in Sport and Exercise Science 3 <sup>rd</sup> year (n=318) |                     |                     |                | Master's Degree in Preventive and Adapted Exercise Science (n=285) |                     |                     |                | Other Master's Degree <sup>1</sup> (n=72) |                     |                     |                |
|                                                                                                                                                                | Absolutely no                                                                                    | No, rather than yes | Yes, rather than no | Absolutely yes | Absolutely no                                                                | No, rather than yes | Yes, rather than no | Absolutely yes | Absolutely no                                                      | No, rather than yes | Yes, rather than no | Absolutely yes | Absolutely no                             | No, rather than yes | Yes, rather than no | Absolutely yes |
|                                                                                                                                                                | %                                                                                                | %                   | %                   | %              | %                                                                            | %                   | %                   | %              | %                                                                  | %                   | %                   | %              | %                                         | %                   | %                   | %              |
| Do you think that physical activity is important to prevent breast, prostate, and colorectum cancers?                                                          | 1                                                                                                | 8                   | 31                  | 60             | 1                                                                            | 4                   | 31                  | 64             | 0                                                                  | 1                   | 14                  | 85             | 0                                         | 3                   | 22                  | 75             |
| Are there teachings in your degree program that explain the prescription of physical activity and exercise as primary prevention of non-communicable diseases? | 17                                                                                               | 36                  | 28                  | 18             | 15                                                                           | 30                  | 26                  | 29             | 4                                                                  | 10                  | 26                  | 60             | 22                                        | 36                  | 21                  | 21             |
| Are there teachings in your degree program that explain the physiopathology and treatments of cancer?                                                          | 26                                                                                               | 41                  | 25                  | 8              | 25                                                                           | 39                  | 25                  | 11             | 12                                                                 | 33                  | 29                  | 26             | 43                                        | 39                  | 10                  | 8              |
| Are there teachings in your degree program that explain the importance of psychological aspect in cancer?                                                      | 37                                                                                               | 40                  | 17                  | 6              | 40                                                                           | 34                  | 17                  | 9              | 21                                                                 | 40                  | 23                  | 16             | 33                                        | 44                  | 14                  | 8              |
| Is exercise important and effective for psycho-physical health in patients with cancer?                                                                        |                                                                                                  |                     |                     |                |                                                                              |                     |                     |                |                                                                    |                     |                     |                |                                           |                     |                     |                |
| Before surgery                                                                                                                                                 | 1                                                                                                | 6                   | 36                  | 58             | 1                                                                            | 5                   | 32                  | 62             | 0                                                                  | 1                   | 18                  | 80             | 3                                         | 4                   | 15                  | 78             |
| During anticancer treatments (chemotherapy, radiotherapy etc.)                                                                                                 | 3                                                                                                | 14                  | 37                  | 46             | 2                                                                            | 18                  | 35                  | 45             | 1                                                                  | 9                   | 26                  | 63             | 1                                         | 8                   | 33                  | 57             |
| After anticancer treatments                                                                                                                                    | 1                                                                                                | 1                   | 18                  | 80             | 0                                                                            | 1                   | 27                  | 72             | 0                                                                  | 1                   | 8                   | 91             | 1                                         | 1                   | 10                  | 88             |



|                                                                                                                                               |    |    |    |    |    |    |    |    |    |    |    |    |    |    |    |   |  |
|-----------------------------------------------------------------------------------------------------------------------------------------------|----|----|----|----|----|----|----|----|----|----|----|----|----|----|----|---|--|
| <i>Are there teachings, in your degree program, that explain the prescription of physical activity and exercise for patients with cancer?</i> |    |    |    |    |    |    |    |    |    |    |    |    |    |    |    |   |  |
| Before surgery                                                                                                                                | 28 | 42 | 18 | 11 | 28 | 37 | 22 | 13 | 12 | 31 | 31 | 27 | 50 | 35 | 13 | 3 |  |
| During anticancer treatments (chemotherapy, radiotherapy etc.)                                                                                | 30 | 40 | 22 | 7  | 28 | 40 | 21 | 11 | 13 | 36 | 28 | 22 | 50 | 33 | 14 | 3 |  |
| After anticancer treatments                                                                                                                   | 28 | 36 | 21 | 15 | 25 | 36 | 24 | 15 | 12 | 28 | 31 | 29 | 46 | 38 | 14 | 3 |  |
| <i>Do you have sufficient knowledge and expertise for counselling physical activity to patients with cancer?</i>                              |    |    |    |    |    |    |    |    |    |    |    |    |    |    |    |   |  |
| Before surgery                                                                                                                                | 49 | 33 | 12 | 6  | 33 | 43 | 18 | 6  | 11 | 40 | 37 | 12 | 35 | 43 | 18 | 4 |  |
| During anticancer treatments (chemotherapy, radiotherapy etc.)                                                                                | 50 | 34 | 10 | 6  | 37 | 46 | 12 | 5  | 13 | 47 | 33 | 8  | 42 | 39 | 15 | 4 |  |
| After anticancer treatments                                                                                                                   | 46 | 31 | 14 | 9  | 31 | 44 | 19 | 6  | 11 | 35 | 41 | 13 | 36 | 36 | 22 | 6 |  |
| <i>Do you have sufficient knowledge and expertise to prescribe exercise in patients with cancer?</i>                                          |    |    |    |    |    |    |    |    |    |    |    |    |    |    |    |   |  |
| Before surgery                                                                                                                                | 49 | 35 | 9  | 7  | 35 | 43 | 18 | 4  | 13 | 41 | 35 | 11 | 42 | 40 | 15 | 3 |  |
| During anticancer treatments (chemotherapy, radiotherapy etc.)                                                                                | 53 | 32 | 8  | 7  | 38 | 47 | 11 | 4  | 14 | 47 | 32 | 7  | 49 | 40 | 10 | 1 |  |
| After anticancer treatments                                                                                                                   | 46 | 34 | 11 | 9  | 34 | 43 | 17 | 6  | 12 | 38 | 38 | 12 | 43 | 36 | 18 | 3 |  |
| <i>Do you have sufficient knowledge and expertise to lead a group-based exercise training for patients with cancer?</i>                       |    |    |    |    |    |    |    |    |    |    |    |    |    |    |    |   |  |
| Before surgery                                                                                                                                | 49 | 33 | 13 | 5  | 32 | 44 | 18 | 5  | 13 | 46 | 34 | 7  | 42 | 38 | 19 | 1 |  |
| During anticancer treatments (chemotherapy, radiotherapy etc.)                                                                                | 50 | 35 | 8  | 6  | 36 | 48 | 11 | 4  | 14 | 52 | 30 | 5  | 46 | 38 | 15 | 1 |  |
| After anticancer treatments                                                                                                                   | 45 | 34 | 13 | 8  | 32 | 43 | 18 | 7  | 12 | 43 | 37 | 8  | 38 | 42 | 18 | 3 |  |
| <i>Do you have sufficient knowledge and expertise to lead an individual-based exercise training for patients with cancer?</i>                 |    |    |    |    |    |    |    |    |    |    |    |    |    |    |    |   |  |
| Before surgery                                                                                                                                | 47 | 32 | 15 | 6  | 31 | 41 | 23 | 6  | 13 | 40 | 35 | 13 | 38 | 42 | 18 | 3 |  |
| During anticancer treatments (chemotherapy, radiotherapy etc.)                                                                                | 51 | 32 | 10 | 7  | 34 | 47 | 14 | 6  | 15 | 46 | 31 | 8  | 46 | 40 | 13 | 1 |  |
| After anticancer treatments                                                                                                                   | 44 | 35 | 13 | 8  | 29 | 41 | 24 | 6  | 12 | 38 | 37 | 13 | 38 | 43 | 17 | 3 |  |

**Table S3.** Comparison of students attending bachelor's degree and master's degree course with regard to knowledge, confidence of physical activity and exercise promotion in patients with cancer

| Variables                                                                                                                                                                   | Academic course                                           | All (No.) | OR <sup>1</sup> | 95% CI <sup>2</sup> | p-value <sup>3</sup> |
|-----------------------------------------------------------------------------------------------------------------------------------------------------------------------------|-----------------------------------------------------------|-----------|-----------------|---------------------|----------------------|
| <i>Do you think that physical activity is important to prevent breast, prostate, and colorectum cancers?</i>                                                                | Bachelor's Degree (reference)                             | 497       | Ref             |                     |                      |
|                                                                                                                                                                             | Preventive and Adapted Exercise Science (Master's Degree) | 285       | 6.68            | 2.03-21.99          | 0.002                |
|                                                                                                                                                                             | Other Master's Degree                                     | 72        | 2.49            | 0.58-10.60          | 0.217                |
| <i>Are there courses in your degree program that explain the prescription of physical activity and exercise as primary prevention of chronic non-communicable diseases?</i> | Bachelor's Degree (reference)                             | 497       | Ref             |                     |                      |
|                                                                                                                                                                             | Preventive and Adapted Exercise Science (Master's Degree) | 285       | 5.29            | 3.79-8.07           | <0.001               |
|                                                                                                                                                                             | Other Master's Degree                                     | 72        | 0.66            | 0.40-1.09           | 0.102                |
| <i>Are there courses in your degree program that explain the physiopathology and treatments of cancer?</i>                                                                  | Bachelor's Degree (reference)                             | 497       | Ref             |                     |                      |
|                                                                                                                                                                             | Preventive and Adapted Exercise Science (Master's Degree) | 285       | 2.28            | 1.69-3.07           | <0.001               |
|                                                                                                                                                                             | Other Master's Degree                                     | 72        | 0.41            | 0.22-0.77           | 0.005                |
| <i>Are there courses in your degree program that explain the importance of psychological aspect in cancer?</i>                                                              | Bachelor's degree (reference)                             | 497       | Ref             |                     |                      |
|                                                                                                                                                                             | Preventive and Adapted Exercise Science (Master's Degree) | 285       | 1.96            | 1.43-2.69           | <0.001               |
|                                                                                                                                                                             | Other Master's Degree                                     | 72        | 0.83            | 0.46-1.50           | 0.530                |
| <i>Is exercise important and effective for psycho-physical health in patients with cancer?</i>                                                                              |                                                           |           |                 |                     |                      |
| During anticancer treatments (chemotherapy, radiotherapy etc.)                                                                                                              | Bachelor's degree (reference)                             | 497       | Ref             |                     |                      |
|                                                                                                                                                                             | Preventive and Adapted Exercise Science (Master's Degree) | 285       | 1.76            | 1.23-2.73           | 0.012                |
|                                                                                                                                                                             | Other Master's Degree                                     | 72        | 2.05            | 0.91-4.63           | 0.083                |
| <i>Are there courses in your degree program that explain the prescription of physical activity and exercise for patients with cancer?</i>                                   |                                                           |           |                 |                     |                      |

|                                                                                                                  |                                                           |     |      |           |        |
|------------------------------------------------------------------------------------------------------------------|-----------------------------------------------------------|-----|------|-----------|--------|
| Before surgery                                                                                                   | Bachelor's Degree (reference)                             | 497 | Ref  |           |        |
|                                                                                                                  | Preventive and Adapted Exercise Science (Master's Degree) | 285 | 2.60 | 1.92-3.51 | <0.001 |
|                                                                                                                  | Other Master's Degree                                     | 72  | 0.36 | 0.18-0.70 | 0.003  |
| During anticancer treatments (chemotherapy, radiotherapy etc.)                                                   | Bachelor's Degree (reference)                             | 497 | Ref  |           |        |
|                                                                                                                  | Preventive and Adapted Exercise Science (Master's Degree) | 285 | 2.34 | 1.73-3.26 | <0.001 |
|                                                                                                                  | Other Master's Degree                                     | 72  | 0.43 | 0.22-0.82 | 0.010  |
| After anticancer treatments                                                                                      | Bachelor's Degree (reference)                             | 497 | Ref  |           |        |
|                                                                                                                  | Preventive and Adapted Exercise Science (Master's Degree) | 285 | 2.44 | 1.81-3.29 | <0.001 |
|                                                                                                                  | Other Master's Degree                                     | 72  | 0.33 | 0.17-0.62 | 0.001  |
| <i>Do you have sufficient knowledge and expertise for counselling physical activity to patients with cancer?</i> |                                                           |     |      |           |        |
| Before surgery                                                                                                   | Bachelor's Degree (reference)                             | 497 | Ref  |           |        |
|                                                                                                                  | Preventive and Adapted Exercise Science (Master's Degree) | 285 | 3.38 | 2.46-4.64 | <0.001 |
|                                                                                                                  | Other Master's Degree                                     | 72  | 1.04 | 0.57-1.89 | 0.900  |
| During anticancer treatments (chemotherapy, radiotherapy etc.)                                                   | Bachelor's Degree (reference)                             | 497 | Ref  |           |        |
|                                                                                                                  | Preventive and Adapted Exercise Science (Master's Degree) | 285 | 3.28 | 2.35-4.59 | <0.001 |
|                                                                                                                  | Other Master's Degree                                     | 72  | 1.20 | 0.64-2.26 | 0.567  |
| After anticancer treatments                                                                                      | Bachelor's Degree (reference)                             | 497 | Ref  |           |        |
|                                                                                                                  | Preventive and Adapted Exercise Science (Master's Degree) | 285 | 3.61 | 2.65-4.93 | <0.001 |
|                                                                                                                  | Other Master's Degree                                     | 72  | 1.18 | 0.68-2.06 | 0.554  |
| <i>Do you have sufficient knowledge and expertise to prescribe exercise in patients with cancer?</i>             |                                                           |     |      |           |        |

|                                                                                                                               |                                                           |     |      |           |        |
|-------------------------------------------------------------------------------------------------------------------------------|-----------------------------------------------------------|-----|------|-----------|--------|
| Before surgery                                                                                                                | Bachelor's Degree (reference)                             | 497 | Ref  |           |        |
|                                                                                                                               | Preventive and Adapted Exercise Science (Master's Degree) | 285 | 3.23 | 2.34-4.46 | <0.001 |
|                                                                                                                               | Other Master's Degree                                     | 72  | 0.88 | 0.47-1.68 | 0.704  |
| During anticancer treatments (chemotherapy, radiotherapy etc.)                                                                | Bachelor's Degree (reference)                             | 497 | Ref  |           |        |
|                                                                                                                               | Preventive and Adapted Exercise Science (Master's Degree) | 285 | 3.30 | 2.34-4.66 | <0.001 |
|                                                                                                                               | Other Master's Degree                                     | 72  | 0.69 | 0.32-1.50 | 0.346  |
| After anticancer treatments                                                                                                   | Bachelor's Degree (reference)                             | 497 | Ref  |           |        |
|                                                                                                                               | Preventive and Adapted Exercise Science (Master's Degree) | 285 | 3.57 | 2.60-4.89 | <0.001 |
|                                                                                                                               | Other Master's Degree                                     | 72  | 0.93 | 0.51-1.71 | 0.815  |
| <i>Do you have sufficient knowledge and expertise to lead a group-based exercise training for patients with cancer?</i>       |                                                           |     |      |           |        |
| Before surgery                                                                                                                | Bachelor's Degree (reference)                             | 497 | Ref  |           |        |
|                                                                                                                               | Preventive and Adapted Exercise Science (Master's Degree) | 285 | 2.45 | 1.78-3.38 | <0.001 |
|                                                                                                                               | Other Master's Degree                                     | 72  | 0.96 | 0.52-1.76 | 0.885  |
| During anticancer treatments (chemotherapy, radiotherapy etc.)                                                                | Bachelor's Degree (reference)                             | 497 | Ref  |           |        |
|                                                                                                                               | Preventive and Adapted Exercise Science (Master's Degree) | 285 | 2.83 | 2.00-4.01 | <0.001 |
|                                                                                                                               | Other Master's Degree                                     | 72  | 1.11 | 0.57-2.16 | 0.770  |
| After anticancer treatments                                                                                                   | Bachelor's Degree (reference)                             | 497 | Ref  |           |        |
|                                                                                                                               | Preventive and Adapted Exercise Science (Master's Degree) | 285 | 2.55 | 1.87-3.47 | <0.001 |
|                                                                                                                               | Other Master's Degree                                     | 72  | 0.76 | 0.42-1.96 | 0.382  |
| <i>Do you have sufficient knowledge and expertise to lead an individual-based exercise training for patients with cancer?</i> |                                                           |     |      |           |        |

|                                                                |                                                           |     |      |           |        |
|----------------------------------------------------------------|-----------------------------------------------------------|-----|------|-----------|--------|
| Before surgery                                                 | Bachelor's Degree (reference)                             | 497 | Ref  |           |        |
|                                                                | Preventive and Adapted Exercise Science (Master's Degree) | 285 | 2.55 | 1.87-3.47 | <0.001 |
|                                                                | Other Master's Degree                                     | 72  | 0.76 | 0.42-1.96 | 0.382  |
| During anticancer treatments (chemotherapy, radiotherapy etc.) | Bachelor's Degree (reference)                             | 497 | Ref  |           |        |
|                                                                | Preventive and Adapted Exercise Science (Master's Degree) | 285 | 2.75 | 1.97-3.82 | <0.001 |
|                                                                | Other Master's Degree                                     | 72  | 0.72 | 0.35-1.45 | 0.355  |
| After anticancer treatments                                    | Bachelor's Degree (reference)                             | 497 | Ref  |           |        |
|                                                                | Preventive and Adapted Exercise Science (Master's Degree) | 285 | 2.71 | 2.00-3.69 | <0.001 |
|                                                                | Other Master's Degree                                     | 72  | 0.66 | 0.35-1.22 | 0.183  |

<sup>1</sup> OR (odds ratios), <sup>2</sup> CI (confidence intervals), and <sup>3</sup> *p*-values from multivariable logistic regression model. Data about the importance and the effectiveness of exercise on psycho-health of patients with cancer resulted non significant in the univariate analysis.

**Table S4.** Comparison of students attending bachelor's degree (1<sup>st</sup> and 2<sup>nd</sup> vs 3<sup>rd</sup> year) and master's degree courses with regard to knowledge, confidence of physical activity, and exercise promotion in patients with cancer

| Variables                                                                                                                                                                   |  | Academic course                                            | All (No.) | OR <sup>1</sup> | 95% CI <sup>2</sup> | p-value <sup>3</sup> |
|-----------------------------------------------------------------------------------------------------------------------------------------------------------------------------|--|------------------------------------------------------------|-----------|-----------------|---------------------|----------------------|
| <i>Do you think that physical activity is important to prevent breast, prostate, and colorectum cancers?</i>                                                                |  | Bachelor's Degree 3 <sup>rd</sup> year (reference)         | 179       | Ref             |                     |                      |
|                                                                                                                                                                             |  | Bachelor's Degree 1 <sup>st</sup> and 2 <sup>nd</sup> year | 318       | 0.51            | 0.25-1.03           | 0.06                 |
|                                                                                                                                                                             |  | Preventive and Adapted Exercise Science (Master's Degree)  | 285       | 4.98            | 1.44-17.27          | 0.01                 |
|                                                                                                                                                                             |  | Other Master's Degree                                      | 72        | 1.85            | 0.42-8.25           | 0.42                 |
| <i>Are there courses in your degree program that explain the prescription of physical activity and exercise as primary prevention of chronic non-communicable diseases?</i> |  | Bachelor's Degree 3 <sup>rd</sup> year (reference)         | 179       | Ref             |                     |                      |
|                                                                                                                                                                             |  | Bachelor's Degree 1 <sup>st</sup> and 2 <sup>nd</sup> year | 318       | 0.71            | 0.50-1.02           | 0.06                 |
|                                                                                                                                                                             |  | Preventive and Adapted Exercise Science (Master's Degree)  | 285       | 5.01            | 3.53-7.47           | <0.001               |
|                                                                                                                                                                             |  | Other Master's Degree                                      | 72        | 0.58            | 0.35-0.98           | 0.042                |
| <i>Are there courses in your degree program that explain the physiopathology and treatments of cancer?</i>                                                                  |  | Bachelor's Degree 3 <sup>rd</sup> year (reference)         | 179       | Ref             |                     |                      |
|                                                                                                                                                                             |  | Bachelor's Degree 1 <sup>st</sup> and 2 <sup>nd</sup> year | 318       | 0.87            | 0.59-1.28           | 0.47                 |
|                                                                                                                                                                             |  | Preventive and Adapted Exercise Science (Master's Degree)  | 285       | 2.17            | 1.56-3.00           | <0.001               |
|                                                                                                                                                                             |  | Other Master's Degree                                      | 72        | 0.40            | 0.21-0.74           | 0.004                |
| <i>Are there courses in your degree program that explain the importance of psychological aspect in cancer?</i>                                                              |  | Bachelor's Degree 3 <sup>rd</sup> year (reference)         | 179       | Ref             |                     |                      |
|                                                                                                                                                                             |  | Bachelor's Degree 1 <sup>st</sup> and 2 <sup>nd</sup> year | 318       | 0.87            | 0.56-1.33           | 0.52                 |
|                                                                                                                                                                             |  | Preventive and Adapted Exercise Science (Master's Degree)  | 285       | 1.83            | 1.30-2.60           | <0.001               |
|                                                                                                                                                                             |  | Other Master's Degree                                      | 72        | 0.81            | 0.44-1.49           | 0.50                 |
| <i>Is exercise important and effective for psycho-physical health in patients with cancer?</i>                                                                              |  |                                                            |           |                 |                     |                      |
| During anticancer treatments (chemotherapy, radiotherapy etc.)                                                                                                              |  | Bachelor's Degree 3 <sup>rd</sup> year (reference)         | 179       | Ref             |                     |                      |
|                                                                                                                                                                             |  | Bachelor's Degree 1 <sup>st</sup> and 2 <sup>nd</sup> year | 318       | 0.84            | 0.39-1.78           | 0.64                 |
|                                                                                                                                                                             |  | Preventive and Adapted Exercise Science (Master's Degree)  | 285       | 4.22            | 1.41-12.61          | 0.01                 |
|                                                                                                                                                                             |  | Other Master's Degree                                      | 72        | 0.80            | 0.29-2.24           | 0.68                 |
| <i>Are there courses in your degree program that explain the prescription of physical activity and exercise for patients with cancer?</i>                                   |  |                                                            |           |                 |                     |                      |

|                                                                                                                  |                                                            |     |      |           |        |
|------------------------------------------------------------------------------------------------------------------|------------------------------------------------------------|-----|------|-----------|--------|
| Before surgery                                                                                                   | Bachelor's Degree 3 <sup>rd</sup> year (reference)         | 179 | Ref  |           |        |
|                                                                                                                  | Bachelor's Degree 1 <sup>st</sup> and 2 <sup>nd</sup> year | 318 | 1.28 | 0.76-1.98 | 0.40   |
|                                                                                                                  | Preventive and Adapted Exercise Science (Master's Degree)  | 285 | 2.02 | 1.27-3.22 | 0.003  |
|                                                                                                                  | Other Master's Degree                                      | 72  | 2.29 | 1.01-5.25 | 0.05   |
| During anticancer treatments<br>(chemotherapy, radiotherapy etc.)                                                | Bachelor's Degree 3 <sup>rd</sup> year (reference)         | 179 | Ref  |           |        |
|                                                                                                                  | Bachelor's Degree 1 <sup>st</sup> and 2 <sup>nd</sup> year | 318 | 1.13 | 0.20-6.22 | 0.89   |
|                                                                                                                  | Preventive and Adapted Exercise Science (Master's Degree)  | 285 | 0.71 | 0.19-2.68 | 0.61   |
|                                                                                                                  | Other Master's Degree                                      | 72  | 0.44 | 0.08-2.48 | 0.35   |
| After anticancer treatments                                                                                      | Bachelor's Degree (reference)                              | 179 | Ref  |           |        |
|                                                                                                                  | Bachelor's Degree 1 <sup>st</sup> and 2 <sup>nd</sup> year | 318 | 0.76 | 0.51-1.13 | 0.18   |
|                                                                                                                  | Preventive and Adapted Exercise Science (Master's Degree)  | 285 | 2.42 | 1.75-3.37 | <0.001 |
|                                                                                                                  | Other Master's Degree                                      | 72  | 0.38 | 0.17-0.65 | 0.001  |
| <i>Do you have sufficient knowledge and expertise for counselling physical activity to patients with cancer?</i> |                                                            |     |      |           |        |
| Before surgery                                                                                                   | Bachelor's Degree 3 <sup>rd</sup> year (reference)         | 179 | Ref  |           |        |
|                                                                                                                  | Bachelor's Degree 1 <sup>st</sup> and 2 <sup>nd</sup> year | 318 | 0.89 | 0.60-1.33 | 0.57   |
|                                                                                                                  | Preventive and Adapted Exercise Science (Master's Degree)  | 285 | 2.19 | 1.58-3.05 | <0.001 |
|                                                                                                                  | Other Master's Degree                                      | 72  | 0.42 | 0.22-0.82 | 0.01   |
| During anticancer treatments<br>(chemotherapy, radiotherapy etc.)                                                | Bachelor's Degree 3 <sup>rd</sup> year (reference)         | 179 | Ref  |           |        |
|                                                                                                                  | Bachelor's Degree 1 <sup>st</sup> and 2 <sup>nd</sup> year | 318 | 0.89 | 0.61-1.30 | 0.56   |
|                                                                                                                  | Preventive and Adapted Exercise Science (Master's Degree)  | 285 | 2.35 | 1.69-3.26 | <0.001 |
|                                                                                                                  | Other Master's Degree                                      | 72  | 0.31 | 0.16-0.61 | <0.001 |
| After anticancer treatments                                                                                      | Bachelor's Degree 3 <sup>rd</sup> year (reference)         | 179 | Ref  |           |        |
|                                                                                                                  | Bachelor's Degree 1 <sup>st</sup> and 2 <sup>nd</sup> year | 318 | 0.71 | 0.44-1.12 | 0.13   |
|                                                                                                                  | Preventive and Adapted Exercise Science (master's degree)  | 285 | 3.09 | 2.18-4.37 | 0.001  |
|                                                                                                                  | Other Master's Degree                                      | 72  | 0.93 | 0.50-1.71 | 0.81   |
| <i>Do you have sufficient knowledge and expertise to prescribe exercise in patients with cancer?</i>             |                                                            |     |      |           |        |

|                                                                                                                         |                                                            |     |      |           |        |
|-------------------------------------------------------------------------------------------------------------------------|------------------------------------------------------------|-----|------|-----------|--------|
| Before surgery                                                                                                          | Bachelor's Degree 3 <sup>rd</sup> year (reference)         | 179 | Ref  |           |        |
|                                                                                                                         | Bachelor's Degree 1 <sup>st</sup> and 2 <sup>nd</sup> year | 318 | 0.89 | 0.54-1.46 | 0.64   |
|                                                                                                                         | Preventive and Adapted Exercise Science (Master's Degree)  | 285 | 3.24 | 2.22-4.71 | <0.001 |
|                                                                                                                         | Other Master's Degree                                      | 72  | 1.15 | 0.60-2.22 | 0.67   |
| During anticancer treatments<br>(chemotherapy, radiotherapy etc.)                                                       | Bachelor's Degree 3 <sup>rd</sup> year (reference)         | 179 | Ref  |           |        |
|                                                                                                                         | Bachelor's Degree 1 <sup>st</sup> and 2 <sup>nd</sup> year | 318 | 0.87 | 0.57-1.34 | 0.52   |
|                                                                                                                         | Preventive and Adapted Exercise Science (Master's Degree)  | 285 | 3.44 | 2.44-4.85 | <0.001 |
|                                                                                                                         | Other Master's Degree                                      | 72  | 1.13 | 0.63-1.99 | 0.69   |
| After anticancer treatments                                                                                             | Bachelor's Degree 3 <sup>rd</sup> year (reference)         | 179 | Ref  |           |        |
|                                                                                                                         | Bachelor's Degree 1 <sup>st</sup> and 2 <sup>nd</sup> year | 318 | 0.69 | 0.43-1.11 | 0.12   |
|                                                                                                                         | Preventive and Adapted Exercise Science (Master's Degree)  | 285 | 2.93 | 2.06-4.17 | <0.001 |
|                                                                                                                         | Other Master's Degree                                      | 72  | 0.78 | 0.41-1.51 | 0.46   |
| <i>Do you have sufficient knowledge and expertise to lead a group-based exercise training for patients with cancer?</i> |                                                            |     |      |           |        |
| Before surgery                                                                                                          | Bachelor's Degree 3 <sup>rd</sup> year (reference)         | 179 | Ref  |           |        |
|                                                                                                                         | Bachelor's Degree 1 <sup>st</sup> and 2 <sup>nd</sup> year | 318 | 0.98 | 0.59-1.63 | 0.92   |
|                                                                                                                         | Preventive and Adapted Exercise Science (Master's Degree)  | 285 | 3.40 | 2.31-5.01 | <0.001 |
|                                                                                                                         | Other Master's Degree                                      | 72  | 0.67 | 0.31-1.52 | 0.35   |
| During anticancer treatments<br>(chemotherapy, radiotherapy etc.)                                                       | Bachelor's Degree 3 <sup>rd</sup> year (reference)         | 179 | Ref  |           |        |
|                                                                                                                         | Bachelor's Degree 1 <sup>st</sup> and 2 <sup>nd</sup> year | 318 | 0.88 | 0.56-1.38 | 0.56   |
|                                                                                                                         | Preventive and Adapted Exercise Science (Master's Degree)  | 285 | 3.46 | 2.43-4.91 | <0.001 |
|                                                                                                                         | Other Master's Degree                                      | 72  | 0.92 | 0.49-1.71 | 0.78   |
| After anticancer treatments                                                                                             | Bachelor's Degree 3 <sup>rd</sup> year (reference)         | 179 | Ref  |           |        |
|                                                                                                                         | Bachelor's Degree 1 <sup>st</sup> and 2 <sup>nd</sup> year | 318 | 0.75 | 0.47-1.18 | 0.21   |
|                                                                                                                         | Preventive and Adapted Exercise Science (Master's Degree)  | 285 | 2.30 | 1.61-3.26 | <0.001 |
|                                                                                                                         | Other Master's Degree                                      | 72  | 0.87 | 0.46-1.62 | 0.66   |



*Do you have sufficient knowledge and expertise to lead an individual-based exercise training for patients with cancer?*

|                                                                   |                                                            |     |      |           |        |
|-------------------------------------------------------------------|------------------------------------------------------------|-----|------|-----------|--------|
| Before surgery                                                    | Bachelor's Degree 3 <sup>rd</sup> year (reference)         | 179 | Ref  |           |        |
|                                                                   | Bachelor's Degree 1 <sup>st</sup> and 2 <sup>nd</sup> year | 318 | 0.66 | 0.43-1.02 | 0.06   |
|                                                                   | Preventive and Adapted Exercise Science (Master's Degree)  | 285 | 2.28 | 1.63-3.19 | <0.001 |
|                                                                   | Other Master's Degree                                      | 72  | 0.67 | 0.36-1.23 | 0.20   |
| During anticancer treatments<br>(chemotherapy, radiotherapy etc.) | Bachelor's Degree 3 <sup>rd</sup> year (reference)         | 179 | Ref  |           |        |
|                                                                   | Bachelor's Degree 1 <sup>st</sup> and 2 <sup>nd</sup> year | 318 | 0.85 | 0.52-1.37 | 0.50   |
|                                                                   | Preventive and Adapted Exercise Science (Master's Degree)  | 285 | 2.69 | 1.86-3.88 | <0.001 |
|                                                                   | Other Master's Degree                                      | 72  | 0.68 | 0.33-1.40 | 0.30   |
| After anticancer treatments                                       | Bachelor's Degree 3 <sup>rd</sup> year (reference)         | 179 | Ref  |           |        |
|                                                                   | Bachelor's Degree 1 <sup>st</sup> and 2 <sup>nd</sup> year | 318 | 0.66 | 0.43-1.02 | 0.06   |
|                                                                   | Preventive and Adapted Exercise Science (Master's Degree)  | 285 | 2.43 | 1.74-3.40 | <0.001 |
|                                                                   | Other Master's Degree                                      | 72  | 0.58 | 0.31-1.08 | 0.09   |

<sup>1</sup> OR (odds ratios), <sup>2</sup> CI (confidence intervals), and <sup>3</sup> *p*-values from multivariable logistic regression model, <sup>4</sup> knowledge and confidence defined as absolutely yes/yes, rather than no vs. no, rather than yes/ absolutely no
